# Supplementary material for: The first genotype II African swine fever virus isolated in Africa provides insight into the current Eurasian pandemic
Source: PubMed Central journal article supplement (PMC8219699; doi:10.1038/s41598-021-92593-2), 2021-06-22

FR682468

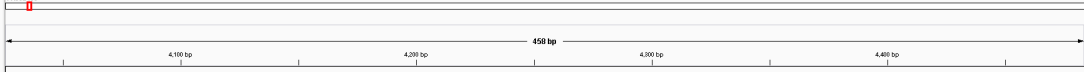

all\_30P\_...Coverage

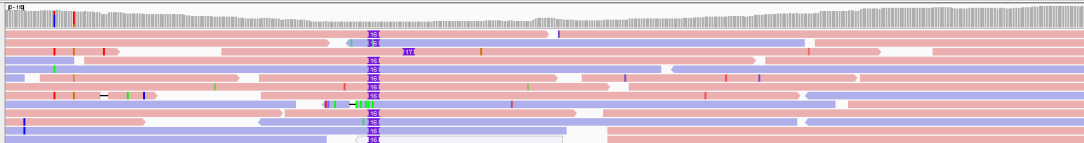all\_30P\_C\_on\_new\_G  
rgia.bam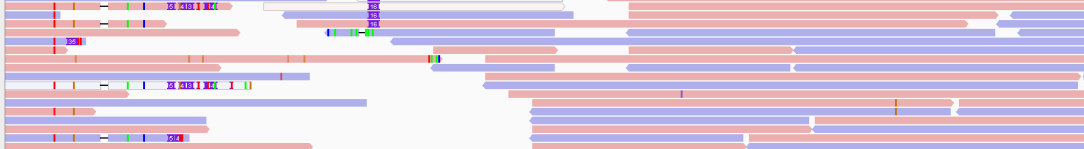

Sequence

IFLARACREIGVDIIPFAKWKFPKNTDWINIVDLVTGGIKYYVDIKMRSSKKNKKKVVYNDNFYIAYCSYYTYYYPSSVFTLETTTTEGLDPRRLWWRALCSWIMLIPELLRCRKNQOTKYDRFDLRLRHSQFLPFYV  
 YFFQEPAEKLEIYFFFLONGLSFSRTOIKRRLITLQEVLNIMKADPPKKTITKKNFNIKMTISTLLALILLIILVMFLYKKQPPKVKVKQKDDGSGEHCVRGSCSSISGLDAMKMDKRNLIKISKISSCEPTPNFYRFTD  
 YFFSKSLQRNWSRHIFFCIMVIVFOEYRLDKGCSYRRYITLCRHKNEILOKNKQOKKIQLILKIQFQHOLELLELLYVLLLPDQFVTIRNNNHKRKSVKIKITVVMESIYFVDHVAHAAAMFQKWTNELLRILRFPHANSLRITPTVLRIT

Annotations

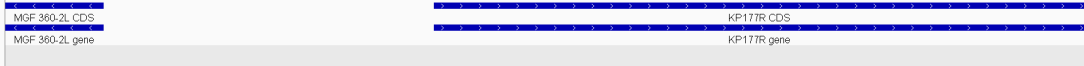

Supplement: 41598_2021_92593_MOESM5_ESM.pdf [file 41598_2021_92593_MOESM5_ESM.pdf]
