# Supplementary material for: The first genotype II African swine fever virus isolated in Africa provides insight into the current Eurasian pandemic
Source: Sci Rep. 2021 Jun 22;11:13081. doi: 10.1038/s41598-021-92593-2 (PMC8219699; doi:10.1038/s41598-021-92593-2)
Supplement: Supplementary file 3 — Supplementary Information 3. [file 41598_2021_92593_MOESM3_ESM.pdf]

|                                                                                                                                                                                                                                                                                                                                               | 1 | 2 | 4 | 6 | 8 | 10 | 12 | 14 | 16 | 18 | 20 | 22 | 24 | 26 | 28 | 30 | 32 | 34 | 36 | 38 | 40 | 42 | 44 | 46 | 48 | 50 | 52 | 54 | 56 | 58 | 60 | 62 | 64 | 66 | 68 | 70 | 72 | 74 | 76 | 78 | 80 | 82 | 84 | 86 | 88 | 90 | 92 |   |   |   |   |   |   |   |   |
|-----------------------------------------------------------------------------------------------------------------------------------------------------------------------------------------------------------------------------------------------------------------------------------------------------------------------------------------------|---|---|---|---|---|----|----|----|----|----|----|----|----|----|----|----|----|----|----|----|----|----|----|----|----|----|----|----|----|----|----|----|----|----|----|----|----|----|----|----|----|----|----|----|----|----|----|---|---|---|---|---|---|---|---|
| ENA EU649697 EU649697.1_African_swine_fever_virus_isolate_Chrome01_B602L_gene_partial_cds.(translated)                                                                                                                                                                                                                                        | S | A | Y | T | C | A  | D  | T  | N  | V  | D  | T  | C  | A  | S  | M  | C  | A  | D  | T  | N  | V  | D  | T  | C  | A  | S  | M  | C  | A  | D  | T  | N  | V  | D  | T  | C  | A  | S  | T  | C  | T  | S  | T  | E  | Y  | T  | D | L | T | D | P | E | R | I |
| ENA EU649696 EU649696.1_African_swine_fever_virus_isolate_Antani03_B602L_gene_partial_cds.(translated)                                                                                                                                                                                                                                        | S | A | Y | T | C | A  | D  | T  | N  | V  | D  | T  | C  | A  | S  | M  | C  | A  | D  | T  | N  | V  | D  | T  | C  | A  | S  | M  | C  | A  | D  | T  | N  | V  | D  | T  | C  | A  | S  | T  | C  | T  | S  | T  | E  | Y  | T  | D | L | T | D | P | E | R | I |
| ENA LC322013 LC322013.1_African_swine_fever_virus_isolate_MAL/19/Karonga/1_B602L_protein_(B602L)_gene_partial_R_ENA MN755871 MN755871.1_African_swine_fever_virus_isolate_MAL/19/Karonga/1_B602L_protein_(B602L)_gene_partial_R_ENA MN755872 MN755872.1_African_swine_fever_virus_isolate_MAL/19/Karonga/2_B602L_protein_(B602L)_gene_partial | S | A | Y | T | C | A  | D  | T  | N  | V  | D  | T  | C  | A  | S  | M  | C  | A  | D  | T  | N  | V  | D  | T  | C  | A  | S  | M  | C  | A  | D  | T  | N  | V  | D  | T  | C  | A  | S  | T  | C  | T  | S  | T  | E  | Y  | T  | D | L | T | D | P | E | R | I |
| ENA MK276887 MK276887.1_African_swine_fever_virus_isolate_Tan_17_01_pB602L_(B602L)_gene_partial_cds.(translated)                                                                                                                                                                                                                              | S | A | Y | T | C | A  | D  | T  | N  | V  | D  | T  | C  | A  | S  | M  | C  | A  | D  | T  | N  | V  | D  | T  | C  | A  | S  | M  | C  | A  | D  | T  | N  | V  | D  | T  | C  | A  | S  | T  | C  | T  | S  | T  | E  | Y  | T  | D | L | T | D | P | E | R | I |
| ENA MK276888 MK276888.1_African_swine_fever_virus_isolate_Tan_17_02_pB602L_(B602L)_gene_partial_cds.(translated)                                                                                                                                                                                                                              | S | A | Y | T | C | A  | D  | T  | N  | V  | D  | T  | C  | A  | S  | M  | C  | A  | D  | T  | N  | V  | D  | T  | C  | A  | S  | M  | C  | A  | D  | T  | N  | V  | D  | T  | C  | A  | S  | T  | C  | T  | S  | T  | E  | Y  | T  | D | L | T | D | P | E | R | I |
| ENA MK276889 MK276889.1_African_swine_fever_virus_isolate_Tan_17_03_pB602L_(B602L)_gene_partial_cds.(translated)                                                                                                                                                                                                                              | S | A | Y | T | C | A  | D  | T  | N  | V  | D  | T  | C  | A  | S  | M  | C  | A  | D  | T  | N  | V  | D  | T  | C  | A  | S  | M  | C  | A  | D  | T  | N  | V  | D  | T  | C  | A  | S  | T  | C  | T  | S  | T  | E  | Y  | T  | D | L | T | D | P | E | R | I |
| ENA MK276890 MK276890.1_African_swine_fever_virus_isolate_Tan_17_05_pB602L_(B602L)_gene_partial_cds.(translated)                                                                                                                                                                                                                              | S | A | Y | T | C | A  | D  | T  | N  | V  | D  | T  | C  | A  | S  | M  | C  | A  | D  | T  | N  | V  | D  | T  | C  | A  | S  | M  | C  | A  | D  | T  | N  | V  | D  | T  | C  | A  | S  | T  | C  | T  | S  | T  | E  | Y  | T  | D | L | T | D | P | E | R | I |
| ENA MK276891 MK276891.1_African_swine_fever_virus_isolate_Tan_17_06_pB602L_(B602L)_gene_partial_cds.(translated)                                                                                                                                                                                                                              | S | A | Y | T | C | A  | D  | T  | N  | V  | D  | T  | C  | A  | S  | M  | C  | A  | D  | T  | N  | V  | D  | T  | C  | A  | S  | M  | C  | A  | D  | T  | N  | V  | D  | T  | C  | A  | S  | T  | C  | T  | S  | T  | E  | Y  | T  | D | L | T | D | P | E | R | I |
| ENA MK276892 MK276892.1_African_swine_fever_virus_isolate_Tan_17_PTF1_pB602L_(B602L)_gene_partial_cds.(translated)                                                                                                                                                                                                                            | S | A | Y | T | C | A  | D  | T  | N  | V  | D  | T  | C  | A  | S  | M  | C  | A  | D  | T  | N  | V  | D  | T  | C  | A  | S  | M  | C  | A  | D  | T  | N  | V  | D  | T  | C  | A  | S  | T  | C  | T  | S  | T  | E  | Y  | T  | D | L | T | D | P | E | R | I |
| ENA MK276893 MK276893.1_African_swine_fever_virus_isolate_Tan_17_PTF2_pB602L_(B602L)_gene_partial_cds.(translated)                                                                                                                                                                                                                            | S | A | Y | T | C | A  | D  | T  | N  | V  | D  | T  | C  | A  | S  | M  | C  | A  | D  | T  | N  | V  | D  | T  | C  | A  | S  | M  | C  | A  | D  | T  | N  | V  | D  | T  | C  | A  | S  | T  | C  | T  | S  | T  | E  | Y  | T  | D | L | T | D | P | E | R | I |
| ENA MK276894 MK276894.1_African_swine_fever_virus_isolate_Tan_15_4_pB602L_(B602L)_gene_partial_cds.(translated)                                                                                                                                                                                                                               | S | A | Y | T | C | A  | D  | T  | N  | V  | D  | T  | C  | A  | S  | M  | C  | A  | D  | T  | N  | V  | D  | T  | C  | A  | S  | M  | C  | A  | D  |    |    |    |    |    |    |    |    |    |    |    |    |    |    |    |    |   |   |   |   |   |   |   |   |
